# Supplementary material
Source: PubMed Central journal article supplement (PMC4324464)
Supplement: NIHMS477481-supplement-Supplementary_Figures.pdf [file NIHMS477481-supplement-Supplementary_Figures.pdf]

**SUPPLEMENTARY MATERIAL**

**Late endosomal Rab7 regulates lysosomal trafficking of endocytic but not biosynthetic cargo in *Trypanosoma brucei***

Jason S. Silverman\*, Kevin J. Schwartz\*, Stephen L. Hajduk<sup>†</sup>, and James D. Bangs\*

\*from the Department of Medical Microbiology & Immunology, University of Wisconsin School of Medicine and Public Health, Madison, WI 53706 and <sup>†</sup>Department of Biochemistry and Molecular Biology, University of Georgia, Athens, GA 30602

Corresponding Author: J.D. Bangs  
Tel.: 1-608-262-3110  
Fax: 1-608-262-8418  
email: [jdbangs@wisc.edu](mailto:jdbangs@wisc.edu)

Running Title: Rab7 and late endosomes in African trypanosomes

---

**Figure S1. Expression of Ty-tagged TbRab7 in BSF trypanosomes.** The TbRab7:Ty reporter was constitutively expressed in cultured BSF trypanosomes as described in Experimental Procedures. As indicated extracts of the transgenic TbRab7:Ty and parental untransformed cells were fractionated by SDS-PAGE ( $10^7$  cell equivalents/lane) and subjected to immunoblotting with anti-Ty antibody (left panel). The membrane was then stripped and reblotted with anti-HSP70 as a loading control (right panel).

**Figure S2. Immunofluorescence localization of TbRab7 in PCF trypanosomes.** PCF trypanosomes were formaldehyde-fixed and NP-40 permeabilized as described in (Sevova & Bangs, 2009). Cells were stained with rat anti-TbRab7 (green) and mouse anti-p67 (red). Costaining with DAPI was done to reveal the nucleus (n) and kinetoplast (k). Three representative 3-channel summed stack projections of deconvolved z series are presented. The TbRab7<sup>+</sup> late endosome (l.e.) and the p67<sup>+</sup> lysosome (ly) are indicated (left panel only). Cell outlines were traced from matched DIC images.

**Figure S3. Effect of TbRab7 silencing in BSF trypanosomes.** The BSF TbRab7 RNAi cell line was cultured without (A) or with (B) tetracycline to induce specific knockdown. Cells were then MeOH/acetone fixed and stained with rat anti-TbRab7 (green) and mouse anti-p67 (red).

Co-staining with DAPI was done to reveal the nucleus (n) and kinetoplast (k). Representative 3-channel epifluorescence images are presented. The images were acquired at identical exposure times, were not deconvolved, and were contrast enhanced identically. The TbRab7<sup>+</sup> late endosome (l.e.) and the p67<sup>+</sup> lysosome (ly) are indicated (left panels only). Cell outlines were traced from matched DIC images.

**Figure S4. Effect of TbRab7 silencing on lysosomal ultrastructure in BSF trypanosomes.**

The BSF TbRab7 RNAi cell line was pulse loaded (2 hr, 37°C) with TL:colloidal gold (15 nm) and then re-cultured for 28 hours without (A) or with (B & C) tetracycline to induce specific knockdown. Cells were fixed and stained for electron microscopy as described in Experimental Procedures. The region of the gold-containing lysosome (white squares) is enlarged in the inserted images. Black bars, 1.0  $\mu$ m; white bars, 0.2  $\mu$ m. Nuclei (n), kinetoplasts (k) and flagellar pocket (fp) are indicated as appropriate.

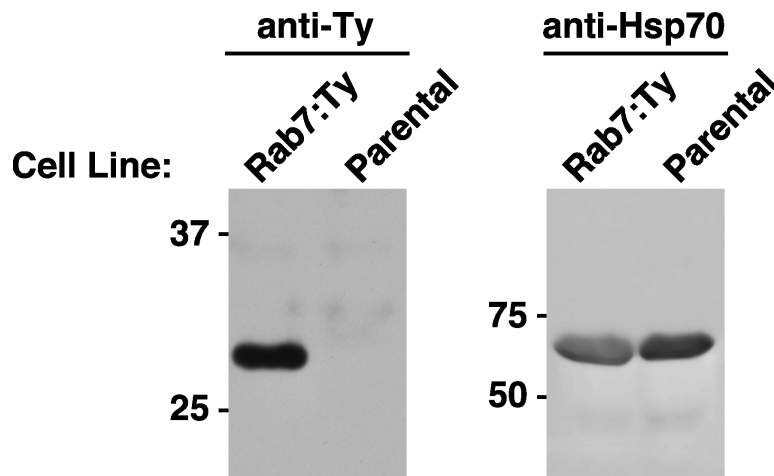

Figure S1

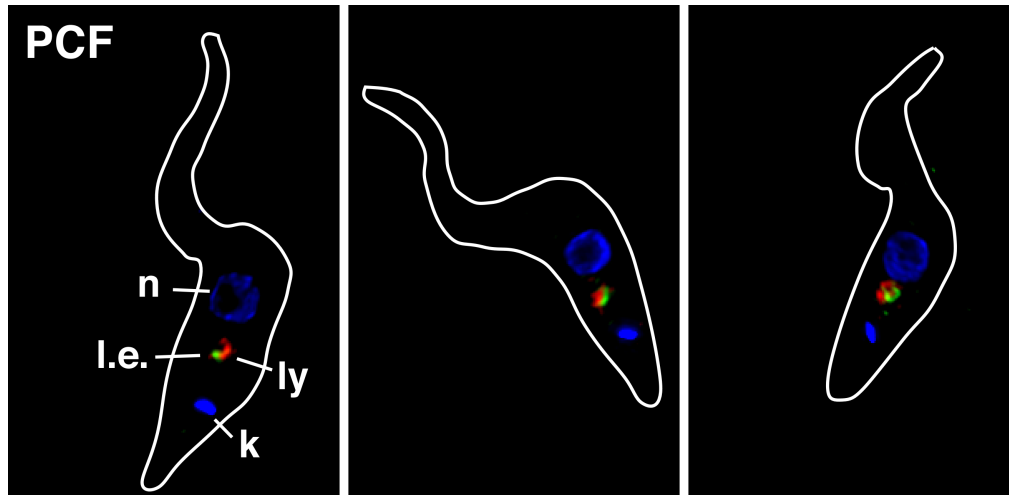

Figure S2

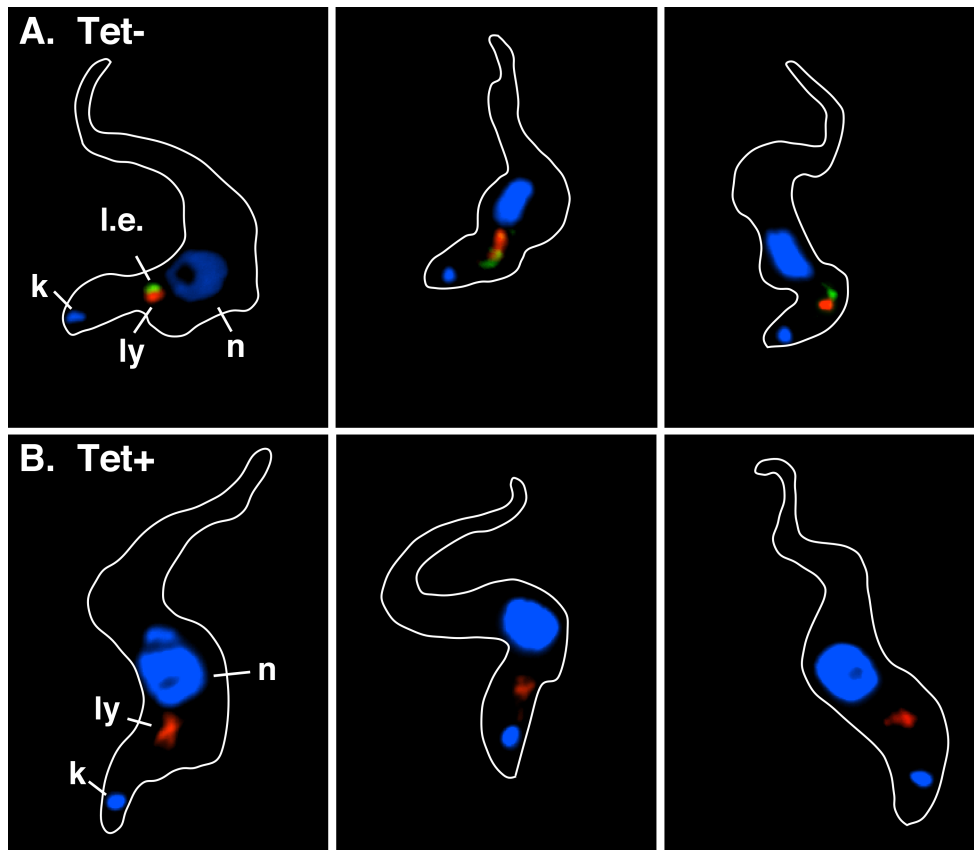

Figure S3

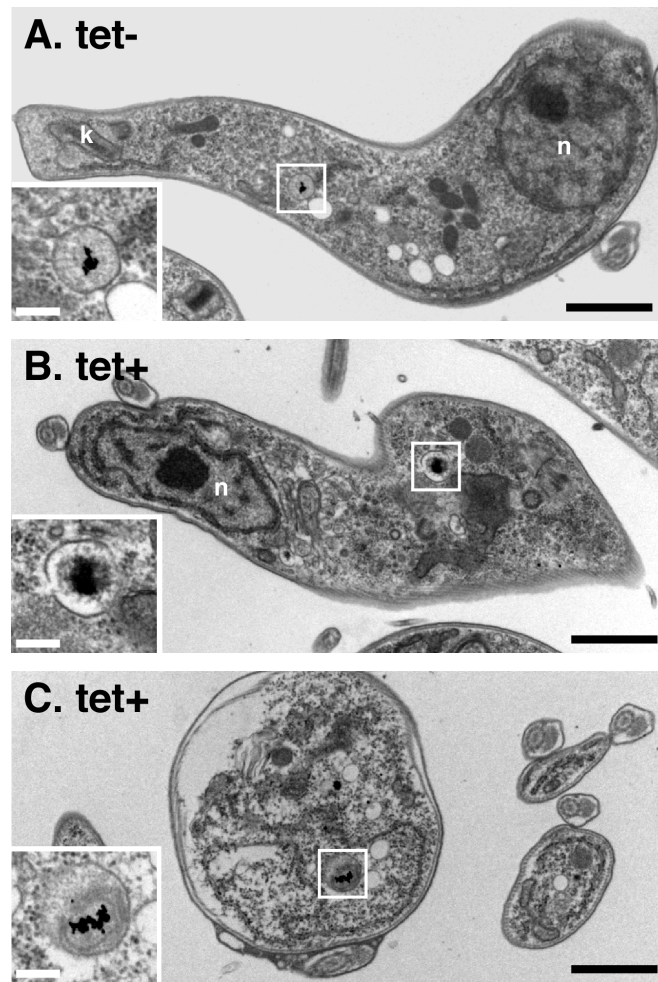

Figure S4
